# Supplementary material
Source: HighWire-hosted journal article supplement (https://adc.bmj.com/content/archdischild-2016-312328)
Supplement: inline-supplementary-material-1 [file inline-supplementary-material-1.pdf]

## Appendix A – Diagnostic Codes

### Codes for identifying events in the CPRD

| Medcode | Read code | Read term                                                    |
|---------|-----------|--------------------------------------------------------------|
| 147     | N322.00   | Non traumatic slipped upper femoral epiphysis                |
| 47594   | N322200   | Non traumatic chronic slipped upper femoral epiphysis        |
| 67269   | N322100   | Non traumatic acute-on-chronic slipped upp femoral epiphysis |
| 50844   | N322000   | Non traumatic acute slipped upper femoral epiphysis          |
| 69215   | 7K1M511   | Fixation of epiphysis, usings adams hip pin                  |

### Codes for identifying events in HES

| ICD-10 | Description                                     |
|--------|-------------------------------------------------|
| M93.0  | Slipped upper femoral epiphysis (non traumatic) |

### Practice Level Deprivation

- 2010 English Index of Multiple Deprivation<sup>[5]</sup>
- 2010 Northern Ireland Multiple Deprivation Measure (MDM)<sup>[8]</sup>
- 2009 Scottish Index of Multiple Deprivation<sup>[7]</sup>
- 2011 Welsh Index of Multiple Deprivation<sup>[6]</sup>

## **Appendix B - Validation of codes between the CPRD and HES datasets**

### **Level of validation**

- (1) (Diagnostic SCFE code within CPRD) AND (diagnostic SCFE code within HES OR specific procedural code pertaining to ‘fixation of the epiphysis’ within HES).
- (2) (Diagnostic code within HES OR CPRD) AND a similar code or code which may be erroneously used in the opposite dataset (femur fracture, hip fracture, dislocated hip, osteochondritis, slipped radial epiphysis).
- (3) (Diagnostic code within HES OR CPRD), AND (evidence in the other dataset of: (a) hospital admission within one month of the index date OR (b) relevant symptomatology (hip pain, knee pain, thigh pain, altered gait) preceding the diagnostic date).
- (4) (Diagnostic code within HES OR CPRD), WITHOUT any related codes in opposite dataset (or no linkage to opposite dataset) BUT with either (a) a clear temporal sequence of events (i.e. multiple entries including documented evidence of relevant symptoms, hospital admission, subsequent discharge codes), (b) recorded procedural codes pertaining to fixation of the hip/ epiphysis, (c) evidence of diagnostic code followed by regular (>3 visits) orthopaedic follow-up hospital attendances, (d) multiple entries of a diagnostic code representing SCFE.
- (5) Diagnostic code within HES OR CPRD, WITHOUT additional supportive evidence (as defined above) to ratify diagnosis.

### **Available Linkage**

Linkage between CPRD and HES was available for 357 of the 650 primary care providers contributing to the CPRD (HES does not cover Scotland, Wales or Northern Ireland, hence is not available at all in these sites, nor in a proportion of English primary care providers who do not contribute linked data). The link was therefore available for 394 cases.

## **Summary**

**86% diagnoses for whom CPRD-HES link was available had external validity (337/394).**

**88% (525/596) of all diagnostic codes had internal or external validity.**

**Cases with CPRD-HES Link available (n=394)**

| <b>Proportion of patients falling within each validation category</b> |                   |                              |
|-----------------------------------------------------------------------|-------------------|------------------------------|
| <b>Validation category</b>                                            | <b>Patients</b>   | <b>Cumulative percentage</b> |
| 1 – Greatest internal validity                                        | 234 (59%)         | 59                           |
| 2                                                                     | 59 (15%)          | 74                           |
| 3                                                                     | 44 (11%)          | 86                           |
| 4                                                                     | 28 (7%)           | 93                           |
| 5 – Lowest internal validity                                          | 29 (7%)           | 100                          |
|                                                                       | <b>394 (100%)</b> |                              |

**Cases without a CPRD-HES Link available (n=202)**

| <b>Proportion of patients falling within each validation category</b>   |                   |                              |
|-------------------------------------------------------------------------|-------------------|------------------------------|
| <b>Validation category</b>                                              | <b>Patients</b>   | <b>Cumulative percentage</b> |
| 4 – Highest internal validity with data available (no-link established) | 159 (79%)         | 79                           |
| 5 – Lowest internal validity                                            | 43 (21%)          | 100                          |
|                                                                         | <b>202 (100%)</b> |                              |

## Appendix C – Identifying symptom codes

### **HIP/ Thigh SPECIFIC CODES - SYMPTOM AND EXAMINATION**

*Words searched in data dictionary*

*Hip, thigh, groin, femur*

|       |                                                     |
|-------|-----------------------------------------------------|
| 286   | Hip Pain                                            |
| 1330  | Hip Joint Pain                                      |
| 1336  | [D]Groin pain                                       |
| 1866  | Thigh Pain                                          |
| 1873  | [SO]Groin                                           |
| 2288  | Other hip injuries                                  |
| 2589  | Other thigh injuries                                |
| 2633  | Other Groin Injuries                                |
| 2633  | Other groin injuries                                |
| 2695  | Synovitis of the hip                                |
| 3419  | Groin Sprain                                        |
| 4460  | Hip Stiff                                           |
| 4527  | [SO]Thigh NEC                                       |
| 5416  | Hip Sprain NOS                                      |
| 5918  | Injury of adductor muscle and tendon of thigh       |
| 7806  | O/E - hip joint abnormal                            |
| 8898  | Other hip sprain                                    |
| 9069  | SO hip joint                                        |
| 9629  | Hip Sprain                                          |
| 9641  | SO Muscle of hip or thigh                           |
| 10270 | SO Femur                                            |
| 10623 | Thigh sprain                                        |
| 10846 | [SO]Hip region NEC                                  |
| 15146 | Arthralgia of the pelvic region and thigh           |
| 15569 | Other joint symptoms of the pelvic region and thigh |
| 20646 | Irritable Hip                                       |
| 23544 | Other thigh sprain                                  |
| 23821 | Injury of muscle and tendon at hip and thigh level  |
| 27541 | Sprain, Hip Joint                                   |
| 27613 | Walking difficulty due to pelvic region and thigh   |
| 31665 | Sprain hip and thigh                                |
| 33407 | Arthralgia of Hip                                   |
| 35689 | Irritable Hip                                       |
| 36520 | Stiff joint NEC, of the pelvic region and thigh     |
| 42080 | Stiff Hip NEC                                       |
| 48987 | Other hip and thigh injuries                        |
| 53916 | [X]Injuries to the hip and thigh                    |
| 57858 | Other Hip and Thigh injuries                        |

69883 Transient arthropathy of the pelvic region and thigh  
101106 [SO]Specified muscle of hip or thigh NEC  
44772 Thigh sprain NOS  
45244 O/E - thigh bone abnormal

### **KNEE SPECIFIC CODES - SYMPTOM ONLY**

*Words searched in data dictionary*

*Knee*

363 [V] Problem knee  
551 Knee Sprain  
554 Knee joint Pain  
  
4604 H/O knee problem  
9033 Prior problem knee  
9517 Knee pain  
3186 Knee sprain NOS  
5781 [SO]Knee joint  
6044 Arthralgia of knee  
6166 Anterior knee pain  
10389 Anterior Knee Pain  
29666 [SO]Knee region  
31575 Sprain of knee and leg  
35925 Other symptoms - knee  
52385 [X]Sprain and strain of other and unspecified parts of knee  
52979 Transient arthropathy-knee

### **GAIT CODES**

*Words searched in data dictionary*

*Limp; gait*

405 Gait Abnormality  
2582 O/E Limping Gait  
2882 O/E Limpong  
14714 [D]Gait abnormality NOS  
  
19052 [D]Ataxic gait  
32121 O/E - ataxic gait  
93421 Disorder of gait and/or balance present  
95802 [X]Other and unspecified abnormalities of gait and mobility

### **NON-SPECIFIC LEG PAIN**

*Words searched in data dictionary*

*Leg*

1219 Leg Pain  
5780 Pain in the leg  
11609 Pain in lower limb  
307 Other leg injury  
  
12039 SO Leg Region  
12222 Leg sprain NOS  
307 Other leg injury  
45798 [SO]Anterior aspect of thigh  
48841 [SO]Adductor muscle of thigh, unspecified



## **Appendix D – Identifying Comorbidity Codes**

*A systematic search of the CPRD data dictionary was performed by two individuals. The search was conducted based on predetermined keywords. Agreed codes are listed below.*

### **Hypothyroidism. Search terms within data dictionary ‘hypothyroid’.**

|       |                                                        |
|-------|--------------------------------------------------------|
| 273   | Hypothyroidism                                         |
| 718   | Subclinical iodine-deficiency hypothyroidism           |
| 3290  | Acquired hypothyroidism                                |
| 3611  | H/O: hypothyroidism                                    |
| 3941  | Hypothyroidism NOS                                     |
| 10097 | Congenital hypothyroidism                              |
| 15743 | Hypothyroidism resulting from para-aminosalicylic acid |
| 19367 | Hypothyroidism monitoring verbal invite                |
| 28735 | Hypothyroidism monitoring administration               |
| 31612 | Congenital hypothyroidism with diffuse goitre          |
| 38976 | Iatrogenic hypothyroidism NOS                          |
| 47521 | Post ablative hypothyroidism                           |
| 50275 | Other postablative hypothyroidism                      |
| 50860 | Postinfectious hypothyroidism                          |
| 51481 | Congenital hypothyroidism NOS                          |
| 51706 | Postablative hypothyroidism NOS                        |
| 56722 | Premature puberty due to hypothyroidism                |
| 69290 | Other specified congenital hypothyroidism              |
| 73107 | [X]Other sp cified hypothyroidism                      |
| 85661 | Hypothyroidism monitoring telephone invitation         |
| 85955 | Hypothyroidism clinical management plan                |
| 93159 | Congenital hypothyroidism without goitre               |
| 94915 | Hypothyroidism resulting from resorcinol               |
| 95830 | Subclinical hypothyroidism                             |
| 97090 | Hypothyroidism resulting from phenylbutazone           |

| code  | term                                  |
|-------|---------------------------------------|
| 1543  | Down's syndrome - trisomy 21          |
| 10759 | Down's syndrome NOS                   |
| 18415 | Trisomy 21                            |
| 32010 | Trisomy 21, mosaicism                 |
| 42701 | Trisomy 21, meiotic nondisjunction    |
| 1048  | Isolated deficiency of growth hormone |

| code  | term |   |
|-------|------|---|
| 72850 |      |   |
| 94479 |      |   |
| 62951 |      |   |
| 92956 |      |   |
| 96458 |      |   |
| 45099 |      |   |
| 91102 |      |   |
| 30425 |      |   |
| 16662 |      |   |
| 22490 |      |   |
| 30547 |      |   |
| 29679 |      |   |
| 22472 |      |   |
| 28809 |      |   |
| 59684 |      |   |
| 45087 |      |   |
| 18904 |      |   |
| 16935 |      |   |
| 38466 |      |   |
| 17048 |      |   |
| 5527  |      |   |
| 10932 |      | 0 |
| 1009  |      | 0 |
| 9706  |      | 0 |
| 1482  |      | 0 |
| 320   |      |   |

**Renal Osteodystrophy** – This is usually a consequence of chronic end stage renal failure. We therefore chose to include codes pertaining severely reduced renal function or end-stage renal failure (CKD 4 and CKD 5), transplant, or dialysis. **Search terms ‘renal ost, ‘osteodys’, ‘chronic k’, ‘renal f’, ‘dialysis’, ‘kidney’. ‘transplant’. The osteodystrophy code will therefore be considered in isolation, and in combination with renal failure codes.**

|       |                                           |   |
|-------|-------------------------------------------|---|
| 29638 | Renal osteodystrophy                      |   |
| 34637 |                                           | 0 |
| 350   |                                           | 0 |
| 512   |                                           | 0 |
| 2994  |                                           | 0 |
| 2996  | Haemodialysis NEC                         |   |
| 2997  | Transplantation of kidney                 |   |
| 5504  | Transplantation of kidney NOS             |   |
| 5911  | [V]Kidney transplanted                    |   |
| 6712  | End stage renal failure                   |   |
| 11745 | Transplantation of kidney from live donor |   |

11773 Dialysis for renal failure  
 12479 Chronic kidney disease stage 4  
 20073 Renal dialysis  
 20196 H/O: renal dialysis  
 28158 Kidney dialysis with complication, without blame  
 30709 Insertion of temporary peritoneal dialysis catheter  
 30756 Continuous ambulatory peritoneal dialysis  
 45160 [V]Aftercare involving peritoneal dialysis  
 46438 [X] Peritoneal dialysis associated peritonitis  
 48639 Mechanical complication of dialysis catheter  
 52088 [V]Preparatory care for dialysis  
 52123 Intestinal dialysis  
 53852 End stage renal failure  
 55151 Autotransplant of kidney  
 60446 Care of haemodialysis equipment  
 60498 Reversing haemodialysis lines  
 66714 Renal dialysis with complication, without blame  
 70874 Other specified transplantation of kidney  
 72004 Excision of rejected transplanted kidney  
 72336 Priming haemodialysis lines  
 88597 Automated peritoneal dialysis  
 93366 Interventions associated with transplantation of kidney  
 95122 Chronic kidney disease stage 4 with proteinuria  
 95405 Chronic kidney disease stage 5 without proteinuria  
 95406 Chronic kidney disease stage 4 without proteinuria  
 95508 Chronic kidney disease stage 5 with proteinuria  
 99692 [V]Aftercare involving extracorporeal dialysis  
 104050 OS interventions associated with transplantation of kidney  
 104586 Flushing of peritoneal dialysis catheter  
 104905 Acute-on-chronic rejection of renal transplant  
 105724 Unexplained episode of renal transplant dysfunction  
 105787 Xenograft renal transplant

| productnumber | class                                   |
|---------------|-----------------------------------------|
| 34420         | Thyroid Hormones                        |
| 51718         | Thyroid Hormones                        |
| 37906         | Thyroid Hormones                        |
| 35998         | Thyroid Hormones                        |
| 13            | Thyroid Hormones                        |
| 42219         | Miscellaneous Cough & Cold Preparations |
| 45238         | Thyroid Hormones                        |
| 50190         | Thyroid Hormones                        |

47318 Thyroid Hormones  
11857 Thyroid Hormones  
10 Thyroid Hormones  
41413 Thyroid Hormones  
45270 Thyroid Hormones  
33084 Thyroid Hormones  
32072 Thyroid Hormones  
34402 Thyroid Hormones  
51477 Thyroid Hormones  
32073 Thyroid Hormones  
35912 Thyroid Hormones  
3941 Thyroid Hormones  
51487 Thyroid Hormones  
27688 Thyroid Hormones  
25566 Thyroid Hormones  
13973 Thyroid Hormones  
46928 Thyroid Hormones  
54303 Thyroid Hormones  
27266 Thyroid Hormones  
27448 Thyroid Hormones  
50345 Thyroid Hormones  
54370 Thyroid Hormones  
30271 Thyroid Hormones  
33976 Thyroid Hormones  
18198 Thyroid Hormones  
25567 Thyroid Hormones  
41519 Thyroid Hormones  
6494 Thyroid Hormones  
43739 Thyroid Hormones  
24994 Thyroid Hormones  
40244 Thyroid Hormones  
48454 Thyroid Hormones  
53167 Thyroid Hormones  
3940 Thyroid Hormones  
10132 Thyroid Hormones  
51717 Thyroid Hormones  
53764 Thyroid Hormones  
32915 Thyroid Hormones  
37844 Thyroid Hormones  
29466 Thyroid Hormones  
37863 Thyroid Hormones  
29182 Thyroid Hormones  
53683 Thyroid Hormones  
53184 Thyroid Hormones  
53083 Thyroid Hormones  
32075 Thyroid Hormones

53266 Thyroid Hormones  
36049 Thyroid Hormones  
27 Thyroid Hormones  
34220 Thyroid Hormones  
29660 Thyroid Hormones

### **Growth Hormone Therapy**

| productnumber | class                                                            |
|---------------|------------------------------------------------------------------|
| 42188         | Anterior Pituitary Hormones - Corticotrophins                    |
| 36149         | Anterior Pituitary Hormones - Corticotrophins                    |
| 18115         | Anterior Pituitary Hormones - Corticotrophins                    |
| 28150         | Unknown                                                          |
| 3424          | Hypothalamic And Anterior Pituitary Hormones And Anti-oestrogens |
| 29448         | Hypothalamic And Anterior Pituitary Hormones And Anti-oestrogens |
| 15111         | Anterior Pituitary Hormones - Corticotrophins                    |
| 31575         | Anterior Pituitary Hormones - Corticotrophins                    |
| 42407         | Hypothalamic And Anterior Pituitary Hormones And Anti-oestrogens |
| 46463         | Anterior Pituitary Hormones - Corticotrophins                    |
| 28469         | Anterior Pituitary Hormones - Corticotrophins                    |
| 19798         | Hypothalamic And Anterior Pituitary Hormones And Anti-oestrogens |
| 18553         | Anterior Pituitary Hormones - Corticotrophins                    |
| 25213         | Hypothalamic And Anterior Pituitary Hormones And Anti-oestrogens |
| 23090         | Anterior Pituitary Hormones - Corticotrophins                    |
| 46033         | Anterior Pituitary Hormones - Corticotrophins                    |
| 28735         | Hypothalamic And Anterior Pituitary Hormones And Anti-oestrogens |
| 47686         | Anterior Pituitary Hormones - Corticotrophins                    |
| 18090         | Anterior Pituitary Hormones - Corticotrophins                    |
| 45778         | Anterior Pituitary Hormones - Corticotrophins                    |
| 40347         | Anterior Pituitary Hormones - Corticotrophins                    |
| 23088         | Anterior Pituitary Hormones - Corticotrophins                    |
| 29454         | Anterior Pituitary Hormones - Corticotrophins                    |
| 21209         | Anterior Pituitary Hormones - Corticotrophins                    |
| 17600         | Anterior Pituitary Hormones - Corticotrophins                    |
| 14338         | Anterior Pituitary Hormones - Corticotrophins                    |
| 7230          | Anterior Pituitary Hormones - Corticotrophins                    |
| 7085          | Anterior Pituitary Hormones - Corticotrophins                    |
| 51004         | Anterior Pituitary Hormones - Corticotrophins                    |
| 26605         | Hypothalamic And Anterior Pituitary Hormones And Anti-oestrogens |
| 44293         | Anterior Pituitary Hormones - Corticotrophins                    |
| 3426          | Hypothalamic And Anterior Pituitary Hormones And Anti-oestrogens |
| 47314         | Anterior Pituitary Hormones - Corticotrophins                    |
| 6489          | Anterior Pituitary Hormones - Corticotrophins                    |
| 16820         | Anterior Pituitary Hormones - Corticotrophins                    |

31039 Hypothalamic And Anterior Pituitary Hormones And Anti-oestrogens  
23803 Hypothalamic And Anterior Pituitary Hormones And Anti-oestrogens  
1441 Anterior Pituitary Hormones - Corticotrophins  
14526 Hypothalamic And Anterior Pituitary Hormones And Anti-oestrogens  
44951 Anterior Pituitary Hormones - Corticotrophins  
15573 Hypothalamic And Anterior Pituitary Hormones And Anti-oestrogens  
19842 Anterior Pituitary Hormones - Corticotrophins  
37966 Anterior Pituitary Hormones - Corticotrophins  
17991 Hypothalamic And Anterior Pituitary Hormones And Anti-oestrogens  
23829 Hypothalamic And Anterior Pituitary Hormones And Anti-oestrogens  
3419 Anterior Pituitary Hormones - Corticotrophins  
18178 Anterior Pituitary Hormones - Corticotrophins  
24929 Anterior Pituitary Hormones - Corticotrophins  
16835 Anterior Pituitary Hormones - Corticotrophins  
33027 Anterior Pituitary Hormones - Corticotrophins  
26348 Anterior Pituitary Hormones - Corticotrophins  
26859 Anterior Pituitary Hormones - Corticotrophins  
15139 Anterior Pituitary Hormones - Corticotrophins  
54950 Anterior Pituitary Hormones - Corticotrophins  
30637 Anterior Pituitary Hormones - Corticotrophins  
46170 Anterior Pituitary Hormones - Corticotrophins  
48188 Anterior Pituitary Hormones - Corticotrophins  
16388 Hypothalamic And Anterior Pituitary Hormones And Anti-oestrogens  
21698 Anterior Pituitary Hormones - Corticotrophins  
19855 Anterior Pituitary Hormones - Corticotrophins  
29613 Anterior Pituitary Hormones - Corticotrophins  
14530 Anterior Pituitary Hormones - Corticotrophins  
26850 Anterior Pituitary Hormones - Corticotrophins  
46165 Anterior Pituitary Hormones - Corticotrophins  
16563 Anterior Pituitary Hormones - Corticotrophins  
16344 Hypothalamic And Anterior Pituitary Hormones And Anti-oestrogens  
31881 Anterior Pituitary Hormones - Corticotrophins  
4839 Anterior Pituitary Hormones - Corticotrophins  
29571 Unknown  
28766 Anterior Pituitary Hormones - Corticotrophins  
4598 Hypothalamic And Anterior Pituitary Hormones And Anti-oestrogens  
45883 Anterior Pituitary Hormones - Corticotrophins  
16841 Anterior Pituitary Hormones - Corticotrophins  
40290 Anterior Pituitary Hormones - Corticotrophins  
32943 Unknown  
4594 Anterior Pituitary Hormones - Corticotrophins  
40793 Anterior Pituitary Hormones - Corticotrophins  
28574 Anterior Pituitary Hormones - Corticotrophins  
55330 Hypothalamic And Anterior Pituitary Hormones And Anti-oestrogens  
26545 Anterior Pituitary Hormones - Corticotrophins  
14246 Anterior Pituitary Hormones - Corticotrophins

- 17831 Hypothalamic And Anterior Pituitary Hormones And Anti-oestrogens
- 14189 Anterior Pituitary Hormones - Corticotrophins
- 46881 Anterior Pituitary Hormones - Corticotrophins
- 42205 Anterior Pituitary Hormones - Corticotrophins
